# Supplementary material for: A long-term retrospective study on rehabilitation of seabirds in Gran Canaria Island, Spain (2003-2013)
Source: PubMed Central journal article supplement (PMC5419649; doi:10.1371/journal.pone.0177366), 2017-05-05
Supplement: pone.0177366.s001.pdf [file pone.0177366.s001.pdf]

**S1 Table.** Veterinary care for the seabird species admitted alive to the Tafira Wildlife Rehabilitation Center (2003-2013).

| <b>Cause of admission</b>             | <b>Care protocol</b>                                                                                                                                                                                                                                                    |
|---------------------------------------|-------------------------------------------------------------------------------------------------------------------------------------------------------------------------------------------------------------------------------------------------------------------------|
| <b>Crude oil</b>                      | Cleaning of mouth, nares and cloaca with physiological saline<br>Eye cleaning (when necessary)<br>Hydrocarbon removal using a rag or towel; cleaning with hot water and degreaser soap; rinsing and drying<br>Oral fluid therapy<br>Appropriate and palatable nutrition |
| <b>Fishing gear</b>                   | Fish hook surgical removal<br>Wound cleaning and disinfection<br>Anti-inflammatory therapy<br>Antibiotic therapy<br>Oral fluid therapy<br>Appropriate and palatable nutrition                                                                                           |
| <b>Light pollution (fallout)</b>      | Oral fluid therapy (when necessary)                                                                                                                                                                                                                                     |
| <b>Metabolic/nutritional disorder</b> | Oral fluid therapy<br>Appropriate and palatable nutrition (if necessary, tube feeding)                                                                                                                                                                                  |
| <b>Orphaned young</b>                 | Appropriate and palatable nutrition                                                                                                                                                                                                                                     |
| <b>Other causes</b>                   | Drying (when found in water ponds)<br>Glue removal using petroleum; cleaning with hot water and degreaser soap; rinsing and drying<br>Oral fluid therapy<br>Appropriate and palatable nutrition (if necessary, tube feeding)                                            |
| <b>Other traumas</b>                  | Surgical removal (gun pellets)<br>Wound cleaning and disinfection<br>Anti-inflammatory therapy<br>Antibiotic therapy<br>Oral fluid therapy<br>Appropriate and palatable nutrition (if necessary, tube feeding)                                                          |
| <b>Poisoning/intoxication</b>         | Oral fluid therapy<br>Appropriate and palatable nutrition (if necessary, tube feeding)                                                                                                                                                                                  |
| <b>Unknown/undetermined</b>           | Oral fluid therapy<br>Appropriate and palatable nutrition (if necessary, tube feeding)<br>Anti-inflammatory therapy (when necessary)<br>Antibiotic therapy (when necessary)                                                                                             |
