# Supplementary material for: A long-term retrospective study on rehabilitation of seabirds in Gran Canaria Island, Spain (2003-2013)
Source: PubMed Central journal article supplement (PMC5419649; doi:10.1371/journal.pone.0177366), 2017-05-05
Supplement: pone.0177366.s002.pdf [file pone.0177366.s002.pdf]

**S2 Table.** Primary causes of morbidity for 1,956 seabirds admitted to the Tafira Wildlife Rehabilitation Center (Gran Canaria Island, Spain) (2003-2013).

| CAUSE OF ADMISSION                     | ORDER PROCELLARIIFORMES              |                          |                        |                          |                       |                           |                              |                           | ORDER SULIFORMES                      |                                     |                       |                                  |
|----------------------------------------|--------------------------------------|--------------------------|------------------------|--------------------------|-----------------------|---------------------------|------------------------------|---------------------------|---------------------------------------|-------------------------------------|-----------------------|----------------------------------|
|                                        | <i>Calonectris diomedea borealis</i> | <i>Bulweria bulwerii</i> | <i>Puffinus baroli</i> | <i>Puffinus puffinus</i> | <i>Ardenna gravis</i> | <i>Fulmarus glacialis</i> | <i>Oceanodroma leucorhoa</i> | <i>Oceanodroma castro</i> | <i>Hydrobates pelagicus pelagicus</i> | <i>Pelagodroma marina hypoleuca</i> | <i>Morus bassanus</i> | <i>Phalacrocorax aristotelis</i> |
| <b>Crude oil</b>                       | 3                                    | 1                        | 0                      | 0                        | 0                     | 0                         | 4                            | 0                         | 1                                     | 3                                   | 6                     | 0                                |
| <b>Fishing gear</b>                    | 4                                    | 0                        | 0                      | 0                        | 0                     | 0                         | 0                            | 0                         | 0                                     | 0                                   | 4                     | 0                                |
| <b>Light pollution (fallout)</b>       | 172                                  | 110                      | 7                      | 7                        | 4                     | 0                         | 75                           | 13                        | 4                                     | 113                                 | 0                     | 0                                |
| <b>Metabolic/nutritional disorder:</b> | 5                                    | 2                        | 1                      | 0                        | 0                     | 0                         | 4                            | 2                         | 0                                     | 6                                   | 30                    | 0                                |
| Weakness                               | 3                                    | 1                        | 1                      | 0                        | 0                     | 0                         | 4                            | 1                         | 0                                     | 4                                   | 19                    | 0                                |
| Cachexia                               | 1                                    | 0                        | 0                      | 0                        | 0                     | 0                         | 0                            | 0                         | 0                                     | 1                                   | 8                     | 0                                |
| Others <sup>a</sup>                    | 1                                    | 1                        | 0                      | 0                        | 0                     | 0                         | 0                            | 1                         | 0                                     | 1                                   | 3                     | 0                                |
| <b>Orphaned young:</b>                 | 21                                   | 37                       | 1                      | 0                        | 2                     | 0                         | 6                            | 0                         | 0                                     | 3                                   | 2                     | 0                                |
| Chicks                                 | 4                                    | 0                        | 0                      | 0                        | 0                     | 0                         | 0                            | 0                         | 0                                     | 0                                   | 0                     | 0                                |
| Fledglings                             | 17                                   | 37                       | 1                      | 0                        | 2                     | 0                         | 6                            | 0                         | 0                                     | 3                                   | 2                     | 0                                |
| <b>Other causes:</b>                   | 6                                    | 3                        | 0                      | 0                        | 0                     | 0                         | 2                            | 0                         | 0                                     | 3                                   | 3                     | 0                                |
| Infectious/parasitic disease           | 0                                    | 0                        | 0                      | 0                        | 0                     | 0                         | 0                            | 0                         | 0                                     | 0                                   | 0                     | 0                                |
| Water pond                             | 4                                    | 1                        | 0                      | 0                        | 0                     | 0                         | 1                            | 0                         | 0                                     | 1                                   | 2                     | 0                                |
| Glue trap                              | 1                                    | 2                        | 0                      | 0                        | 0                     | 0                         | 0                            | 0                         | 0                                     | 0                                   | 0                     | 0                                |
| Miscellany                             | 1                                    | 0                        | 0                      | 0                        | 0                     | 0                         | 1                            | 0                         | 0                                     | 2                                   | 1                     | 0                                |
| <b>Other traumas:</b>                  | 157                                  | 23                       | 1                      | 2                        | 1                     | 0                         | 15                           | 1                         | 1                                     | 22                                  | 3                     | 0                                |
| Gunshot                                | 0                                    | 0                        | 0                      | 0                        | 0                     | 0                         | 0                            | 0                         | 0                                     | 0                                   | 0                     | 0                                |
| Collision                              | 2                                    | 0                        | 0                      | 0                        | 0                     | 0                         | 0                            | 0                         | 0                                     | 1                                   | 0                     | 0                                |
| Predation                              | 71                                   | 1                        | 0                      | 0                        | 0                     | 0                         | 1                            | 0                         | 0                                     | 1                                   | 0                     | 0                                |
| Peck                                   | 0                                    | 0                        | 0                      | 0                        | 0                     | 0                         | 0                            | 0                         | 0                                     | 0                                   | 0                     | 0                                |
| Unknown origin                         | 84                                   | 22                       | 1                      | 2                        | 1                     | 0                         | 14                           | 1                         | 1                                     | 20                                  | 3                     | 0                                |
| <b>Poisoning/intoxication</b>          | 0                                    | 0                        | 0                      | 0                        | 0                     | 0                         | 0                            | 0                         | 0                                     | 0                                   | 0                     | 0                                |
| <b>Unknown/undetermined</b>            | 25                                   | 9                        | 0                      | 2                        | 0                     | 1                         | 22                           | 0                         | 0                                     | 8                                   | 4                     | 1                                |
| <b>TOTAL no. seabirds</b>              | <b>393</b>                           | <b>185</b>               | <b>10</b>              | <b>11</b>                | <b>7</b>              | <b>1</b>                  | <b>128</b>                   | <b>16</b>                 | <b>6</b>                              | <b>158</b>                          | <b>52</b>             | <b>1</b>                         |
| <b>% seabirds</b>                      | <b>20.09</b>                         | <b>9.45</b>              | <b>0.51</b>            | <b>0.56</b>              | <b>0.35</b>           | <b>0.05</b>               | <b>6.54</b>                  | <b>0.81</b>               | <b>0.3</b>                            | <b>8.07</b>                         | <b>2.65</b>           | <b>0.05</b>                      |

**Table S2 (continued).** Primary causes of morbidity for 1,956 seabirds admitted to the Tafira Wildlife Rehabilitation Center (Gran Canaria Island, Spain) (2003-2013).

| CAUSE OF ADMISSION                     | ORDER CHARADRIIFORMES |                          |                         |                         |                                   |                               |                                |                         |                           | TOTAL no. cases | %            |
|----------------------------------------|-----------------------|--------------------------|-------------------------|-------------------------|-----------------------------------|-------------------------------|--------------------------------|-------------------------|---------------------------|-----------------|--------------|
|                                        | <i>Larus fuscus</i>   | <i>Larus michahellis</i> | <i>Rissa tridactyla</i> | <i>Larus argentatus</i> | <i>Chroicocephalus ridibundus</i> | <i>Sterna hirundo hirundo</i> | <i>Thalasseus sandvicensis</i> | <i>Chlidonias niger</i> | <i>Fratercula arctica</i> |                 |              |
| <b>Crude oil</b>                       | 0                     | 9                        | 1                       | 0                       | 1                                 | 2                             | 5                              | 0                       | 0                         | <b>36</b>       | <b>1.84</b>  |
| <b>Fishing gear</b>                    | 1                     | 83                       | 1                       | 0                       | 0                                 | 1                             | 1                              | 0                       | 0                         | <b>95</b>       | <b>4.85</b>  |
| <b>Light pollution (fallout)</b>       | 0                     | 0                        | 0                       | 0                       | 0                                 | 0                             | 0                              | 0                       | 0                         | <b>505</b>      | <b>25.81</b> |
| <b>Metabolic/nutritional disorder:</b> | 0                     | 56                       | 3                       | 0                       | 1                                 | 2                             | 2                              | 1                       | 0                         | <b>115</b>      | <b>5.87</b>  |
| Weakness                               | 0                     | 30                       | 1                       | 0                       | 1                                 | 1                             | 1                              | 1                       | 0                         | <b>68</b>       | <b>3.47</b>  |
| Cachexia                               | 0                     | 15                       | 1                       | 0                       | 0                                 | 1                             | 1                              | 0                       | 0                         | <b>28</b>       | <b>1.43</b>  |
| Others <sup>a</sup>                    | 0                     | 11                       | 1                       | 0                       | 0                                 | 0                             | 0                              | 0                       | 0                         | <b>19</b>       | <b>0.97</b>  |
| <b>Orphaned young:</b>                 | 1                     | 31                       | 0                       | 0                       | 0                                 | 1                             | 1                              | 0                       | 0                         | <b>106</b>      | <b>5.41</b>  |
| Chicks                                 | 0                     | 1                        | 0                       | 0                       | 0                                 | 0                             | 0                              | 0                       | 0                         | <b>5</b>        | <b>0.25</b>  |
| Fledglings                             | 1                     | 30                       | 0                       | 0                       | 0                                 | 1                             | 1                              | 0                       | 0                         | <b>101</b>      | <b>5.16</b>  |
| <b>Other causes:</b>                   | 0                     | 12                       | 0                       | 0                       | 0                                 | 0                             | 1                              | 0                       | 0                         | <b>30</b>       | <b>1.53</b>  |
| Infectious/parasitic disease           | 0                     | 3                        | 0                       | 0                       | 0                                 | 0                             | 0                              | 0                       | 0                         | <b>3</b>        | <b>0.15</b>  |
| Water pond                             | 0                     | 1                        | 0                       | 0                       | 0                                 | 0                             | 1                              | 0                       | 0                         | <b>11</b>       | <b>0.56</b>  |
| Glue trap                              | 0                     | 0                        | 0                       | 0                       | 0                                 | 0                             | 0                              | 0                       | 0                         | <b>3</b>        | <b>0.15</b>  |
| Miscellany                             | 0                     | 8                        | 0                       | 0                       | 0                                 | 0                             | 0                              | 0                       | 0                         | <b>13</b>       | <b>0.66</b>  |
| <b>Other traumas:</b>                  | 1                     | 114                      | 0                       | 2                       | 1                                 | 3                             | 7                              | 0                       | 1                         | <b>355</b>      | <b>18.14</b> |
| Gunshot                                | 0                     | 0                        | 0                       | 0                       | 0                                 | 1                             | 0                              | 0                       | 0                         | <b>1</b>        | <b>0.05</b>  |
| Collision                              | 0                     | 1                        | 0                       | 0                       | 0                                 | 0                             | 0                              | 0                       | 0                         | <b>4</b>        | <b>0.2</b>   |
| Predation                              | 0                     | 0                        | 0                       | 0                       | 0                                 | 0                             | 0                              | 0                       | 0                         | <b>74</b>       | <b>3.78</b>  |
| Peck                                   | 0                     | 8                        | 0                       | 0                       | 0                                 | 0                             | 0                              | 0                       | 0                         | <b>8</b>        | <b>0.4</b>   |
| Unknown origin                         | 1                     | 105                      | 0                       | 2                       | 1                                 | 2                             | 7                              | 0                       | 1                         | <b>268</b>      | <b>13.7</b>  |
| <b>Poisoning/intoxication</b>          | 18                    | 455                      | 2                       | 2                       | 6                                 | 0                             | 0                              | 0                       | 0                         | <b>483</b>      | <b>24.69</b> |
| <b>Unknown/undetermined</b>            | 3                     | 150                      | 0                       | 1                       | 1                                 | 2                             | 2                              | 0                       | 0                         | <b>231</b>      | <b>11.8</b>  |
| <b>TOTAL no. seabirds</b>              | <b>24</b>             | <b>910</b>               | <b>7</b>                | <b>5</b>                | <b>10</b>                         | <b>11</b>                     | <b>19</b>                      | <b>1</b>                | <b>1</b>                  | <b>1,956</b>    |              |
| <b>% seabirds</b>                      | <b>1.22</b>           | <b>46.52</b>             | <b>0.35</b>             | <b>0.25</b>             | <b>0.51</b>                       | <b>0.56</b>                   | <b>0.97</b>                    | <b>0.05</b>             | <b>0.05</b>               |                 |              |

<sup>a</sup> Other systemic diseases: respiratory, digestive, etc.
