# Supplementary material for: A long-term retrospective study on rehabilitation of seabirds in Gran Canaria Island, Spain (2003-2013)
Source: PubMed Central journal article supplement (PMC5419649; doi:10.1371/journal.pone.0177366), 2017-05-05
Supplement: pone.0177366.s003.pdf [file pone.0177366.s003.pdf]

**S3 Table.** Causes of admission of seabirds to the TWRC Center (2003-2013) and statistical comparison between species with more than 100 admissions.

| CAUSE OF ADMISSION                    | Number | %     | OR (CI 95%) [P-value]                |                             |                              |                                     |                               |
|---------------------------------------|--------|-------|--------------------------------------|-----------------------------|------------------------------|-------------------------------------|-------------------------------|
|                                       |        |       | <i>Calonectris diomedea borealis</i> | <i>Bulweria bulwerii</i>    | <i>Oceanodroma leucorhoa</i> | <i>Pelagodroma marina hypoleuca</i> | <i>Larus michahellis</i>      |
| <b>Crude oil</b>                      | 36     | 1.84  | 0.35 (0.1-1.16) [ns]                 | 0.27 (0.03-1.97) [ns]       | 1.81 (0.63-5.2) [ns]         | 1.03 (0.31-3.41) [ns]               | 0.37 (0.17-0.8) [0.009]       |
| <b>Fishing gear</b>                   | 95     | 4.85  | 0.16 (0.06-0.45) [<0.0001]           | 0                           | 0                            | 0                                   | 8.64 (4.68-15.95) [<0.0001]   |
| <b>Light pollution (fallout)</b>      | 505    | 25.81 | 2.87 (2.27-3.63) [<0.0001]           | 5.1 (3.73-6.99) [<0.0001]   | 4.6 (3.18-6.64) [<0.0001]    | 9 (6.26-12.95) [<0.0001]            | 0                             |
| <b>Metabolic/nutritional disorder</b> | 115    | 5.87  | 0.17 (0.07-0.42) [<0.0001]           | 0.16 (0.04-0.65) [0.004]    | 0.49 (0.18-1.37) [ns]        | 0.61 (0.26-1.41) [ns]               | 1.09 (0.75-1.59) [ns]         |
| Weakness                              | 68     | 3.47  | 0.08 (0.02-0.28) [<0.0001]           | 0.11 (0.01-0.81) [0.009]    | 1.39 (0.46-4.17) [ns]        | 1.05 (0.36-3.1) [ns]                | 1.53 (0.91-2.55) [ns]         |
| Cachexia                              | 28     | 1.43  | 0.07 (0.01-0.57) [0.001]             | 0                           | 0                            | 0.61 (0.08-4.64) [ns]               | 2.21 (1.03-4.74) [0.03]       |
| Others <sup>a</sup>                   | 19     | 0.97  | 0.11 (0.01-0.89) [0.013]             | 0.45 (0.06-3.45) [ns]       | 0                            | 0.93 (0.12-7.2) [ns]                | 2.62 (1.03-6.61) [0.035]      |
| <b>Orphaned Young:</b>                | 106    | 5.41  | 0.98 (0.6-1.6) [ns]                  | 6.16 (3.99-9.51) [<0.0001]  | 0.85 (0.36-1.97) [ns]        | 0.31 (0.1-1.01) [0.041]             | 0.45 (0.29-0.7) [<0.0001]     |
| Chicks                                | 5      | 0.25  | 8.99 (0.99-81.02) [0.018]            | 0                           | 0                            | 0                                   | 0.45 (0.51-4.13) [ns]         |
| Fledglings                            | 101    | 5.16  | 0.39 (0.22-0.68) [0.001]             | 9.84 (5.64-17.17) [<0.0001] | 1.45 (0.57-3.7) [ns]         | 0.46 (0.14-1.56) [ns]               | 0.74 (0.46-1.18) [ns]         |
| <b>Other causes:</b>                  | 30     | 1.53  | 0.99 (0.4-2.44) [ns]                 | 1.06 (0.32-3.54) [ns]       | 1.02 (0.24-4.33) [ns]        | 1.27 (0.38-4.23) [ns]               | 0.76 (0.36-1.59) [ns]         |
| Infectious/parasitic disease          | 3      | 0.15  | 0                                    | 0                           | 0                            | 0                                   | 0                             |
| Water pond                            | 11     | 0.56  | 1.26 (0.36-4.37) [ns]                | 0.83 (0.1-6.58) [ns]        | 2.18 (0.27-17.74) [ns]       | 1.7 (0.21-13.7) [ns]                | 0.18 (0.02-1.42) [ns]         |
| Glue trap                             | 3      | 0.15  | 1.1 (0.09-12.24) [ns]                | 17.14 (1.53-191.74) [0.002] | 0                            | 0                                   | 0                             |
| Miscellany                            | 13     | 0.66  | 0.18 (0.02-1.39) [ns]                | 0                           | 1.81 (0.22-14.51) [ns]       | 3.18 (0.67-14.99) [ns]              | 3.02 (0.97-9.37) [0.044]      |
| <b>Other traumas</b>                  | 355    | 18.14 | 4.58 (3.56-5.89) [<0.0001]           | 0.61 (0.39-0.96) [0.03]     | 0.58 (0.33-1.01) [ns]        | 0.71 (0.44-1.13) [ns]               | 0.47 (0.37-0.61) [<0.0001]    |
| Gunshot                               | 1      | 0.05  | 0                                    | 0                           | 0                            | 0                                   | 0                             |
| Collision                             | 4      | 0.2   | 2.21 (0.31-15.87) [ns]               | 0                           | 0                            | 5.74 (0.58-56.76) [ns]              | 0.61 (0.06-5.93) [ns]         |
| Predation                             | 74     | 3.78  | 83.03 (25.68-268.39) [<0.0001]       | 0.1 (0.01-0.73) [0.005]     | 0.26 (0.03-1.99) [ns]        | 0.2 (0.02-1.53) [ns]                | 0                             |
| Peck                                  | 8      | 0.4   | 0                                    | 0                           | 0                            | 0                                   | 0                             |
| Unknown origin                        | 268    | 13.7  | 1.01 (0.71-1.43) [ns]                | 0.61 (0.35-1.05) [ns]       | 1.37 (0.63-2.98) [ns]        | 1.86 (0.92-3.76) [ns]               | 1.37 (0.98-1.91) [ns]         |
| <b>Poisoning/intoxication</b>         | 483    | 24.69 | 0                                    | 0                           | 0                            | 0                                   | 36.35 (24.43-54.09) [<0.0001] |
| <b>Unknown/undetermined</b>           | 231    | 11.8  | 0.44 (0.29-0.68) [<0.0001]           | 0.35 (0.18-0.7) [0.002]     | 1.6 (0.99-2.6) [ns]          | 0.37 (0.18-0.77) [0.006]            | 2.35 (1.76-3.13) [<0.0001]    |

ns: no statistical significance ( $P>0.05$ ); <sup>a</sup> Other systemic diseases: respiratory, digestive, etc.
