# Supplementary material for: A long-term retrospective study on rehabilitation of seabirds in Gran Canaria Island, Spain (2003-2013)
Source: PubMed Central journal article supplement (PMC5419649; doi:10.1371/journal.pone.0177366), 2017-05-05
Supplement: pone.0177366.s004.pdf [file pone.0177366.s004.pdf]

**S4 Table.** Final disposition of the seabird species admitted alive to the Tafira Wildlife Rehabilitation Center (2003-2013).

| Species                                                          | Number of seabirds | Final disposition |                    |            |                    |              |                    |
|------------------------------------------------------------------|--------------------|-------------------|--------------------|------------|--------------------|--------------|--------------------|
|                                                                  |                    | Euthanized        |                    | Died       |                    | Released     |                    |
|                                                                  |                    | Number            | E <sub>r</sub> (%) | Number     | M <sub>r</sub> (%) | Number       | R <sub>r</sub> (%) |
| <b>Order Procellariiformes</b>                                   | 834                | 97                | 11.63              | 42         | 5.03               | 695          | 83.33              |
| <b>Family Procellariidae</b>                                     |                    |                   |                    |            |                    |              |                    |
| Cory's Shearwater ( <i>Calonectris diomedea borealis</i> )       | 318                | 70                | 22.01              | 14         | 4.4                | 234          | 73.58              |
| Bulwer's Petrel ( <i>Bulweria bulwerii</i> )                     | 182                | 10                | 5.49               | 5          | 2.74               | 167          | 91.75              |
| Barolo Shearwater ( <i>Puffinus baroli</i> )                     | 10                 | 0                 | 0                  | 1          | 10                 | 9            | 90                 |
| Manx Shearwater ( <i>Puffinus puffinus</i> )                     | 11                 | 0                 | 0                  | 2          | 18.18              | 9            | 81.81              |
| Great Shearwater ( <i>Ardenna gravis</i> )                       | 7                  | 1                 | 14.28              | 0          | 0                  | 6            | 85.71              |
| Northern Fulmar ( <i>Fulmarus glacialis</i> )                    | 1                  | 0                 | 0                  | 0          | 0                  | 1            | 100                |
| <b>Family Hydrobatidae</b>                                       |                    |                   |                    |            |                    |              |                    |
| Leach's Storm-Petrel ( <i>Oceanodroma leucorhoa</i> )            | 126                | 4                 | 3.17               | 8          | 6.34               | 114          | 90.47              |
| Band-rumped Storm-Petrel ( <i>Oceanodroma castro</i> )           | 16                 | 1                 | 6.25               | 1          | 6.25               | 14           | 87.5               |
| European Storm-Petrel ( <i>Hydrobates pelagicus pelagicus</i> )  | 6                  | 1                 | 16.67              | 0          | 0                  | 5            | 83.33              |
| White-faced Storm-Petrel ( <i>Pelagodroma marina hypoleuca</i> ) | 157                | 10                | 6.36               | 11         | 7.01               | 136          | 86.62              |
| <b>Order Suliformes</b>                                          | 52                 | 3                 | 5.76               | 31         | 59.61              | 18           | 34.61              |
| <b>Family Sulidae</b>                                            |                    |                   |                    |            |                    |              |                    |
| Northern Gannet ( <i>Morus bassanus</i> )                        | 51                 | 3                 | 5.88               | 31         | 60.78              | 17           | 33.33              |
| <b>Family Phalacrocoracidae</b>                                  |                    |                   |                    |            |                    |              |                    |
| European Shag ( <i>Phalacrocorax aristotelis</i> )               | 1                  | 0                 | 0                  | 0          | 0                  | 1            | 100                |
| <b>Order Charadriiformes</b>                                     | 937                | 180               | 19.21              | 224        | 23.9               | 533          | 56.88              |
| <b>Family Laridae</b>                                            |                    |                   |                    |            |                    |              |                    |
| Lesser Black-backed Gull ( <i>Larus fuscus</i> )                 | 24                 | 4                 | 16.67              | 5          | 20.83              | 15           | 62.5               |
| Yellow-legged Gull ( <i>Larus michahellis</i> )                  | 863                | 166               | 19.23              | 202        | 23.4               | 495          | 57.35              |
| Black-legged Kittiwake ( <i>Rissa tridactyla</i> )               | 6                  | 1                 | 16.67              | 3          | 50                 | 2            | 33.33              |
| Herring Gull ( <i>Larus argentatus</i> )                         | 5                  | 1                 | 20                 | 1          | 20                 | 3            | 60                 |
| Black-headed Gull ( <i>Chroicocephalus ridibundus</i> )          | 9                  | 0                 | 0                  | 3          | 33.33              | 6            | 66.67              |
| Common Tern ( <i>Sterna hirundo hirundo</i> )                    | 10                 | 2                 | 20                 | 6          | 60                 | 2            | 20                 |
| Sandwich Tern ( <i>Thalasseus sandvicensis</i> )                 | 18                 | 5                 | 27.78              | 4          | 22.22              | 9            | 50                 |
| Black Tern ( <i>Chlidonias niger</i> )                           | 1                  | 0                 | 0                  | 0          | 0                  | 1            | 100                |
| <b>Family Alcidae</b>                                            |                    |                   |                    |            |                    |              |                    |
| Atlantic Puffin ( <i>Fratercula arctica</i> )                    | 1                  | 1                 | 100                | 0          | 0                  | 0            | 0                  |
| <b>TOTAL</b>                                                     | <b>1,823</b>       | <b>280</b>        | <b>15.35</b>       | <b>297</b> | <b>16.29</b>       | <b>1,246</b> | <b>68.34</b>       |
